# Supplementary material
Source: publisher site journal article supplement (https://www.spandidos-publications.com/4335/downloadSupplementary)

Figure S1. Western blot analysis demonstrated that cisplatin treatment attenuated UBE2B levels in nasopharyngeal carcinoma cells. The representative histograms indicate that UBE2B levels were decreased by 14% in TW01 cells, as compared with those in the control cells. TW01 cells were treated with cisplatin (10  $\mu$ M) for 8 h. Representative results of at least three independent experiments are presented. Values are expressed as the mean  $\pm$  standard deviation of at least three independent experiments. \*\*P<0.01. UBE2B, ubiquitin-conjugating enzyme E2 B; ctrl, control.

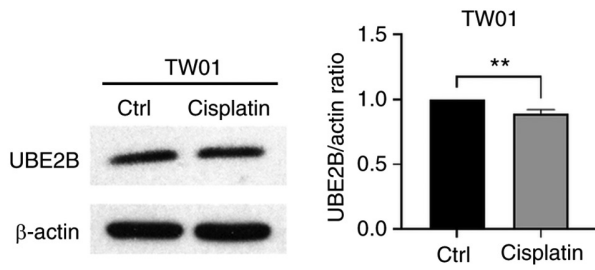

Figure S2. Expression levels of EGFP-MGMT proteins in TW01 cells transfected with pEGFPc1-MGMT plasmids were evaluated by using western blot analysis. Anti-EGFR and MGMT antibodies were used to detect the presence of EGFP-MGMT protein. At least three independent experiments were performed. Actin expression levels were used as the internal control. MGMT, O6-methylguanine-DNA methyltransferase; pEGFP, plasmid expressing enhanced green fluorescence protein; ctrl, control.

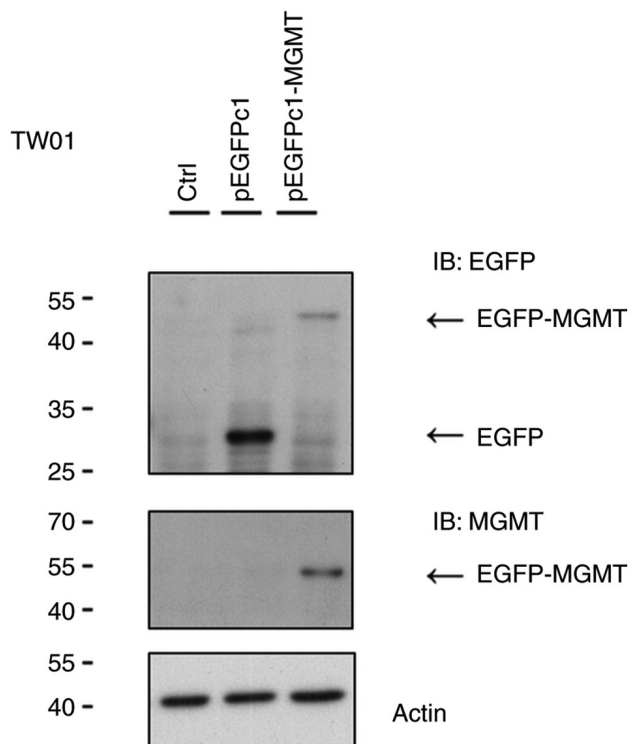

Supplement: Supplementary file 1 [file downloadSupplementary]
